# Supplementary material for: Synthesis of PVP-functionalized ultra-small MoS2 nanoparticles with intrinsic peroxidase-like activity for H2O2 and glucose detection
Source: Royal Society of Chemistry journal article supplement (doi:10.1039/c6ra18050g), 2016-01-01
Supplement: c6ra18050g1.pdf [file c6ra18050g1.pdf]

## Electronic Supplementary Material

### Synthesis of PVP-functionalized ultra-small MoS<sub>2</sub> nanoparticles with intrinsic peroxidase-like activity for H<sub>2</sub>O<sub>2</sub> and glucose detection

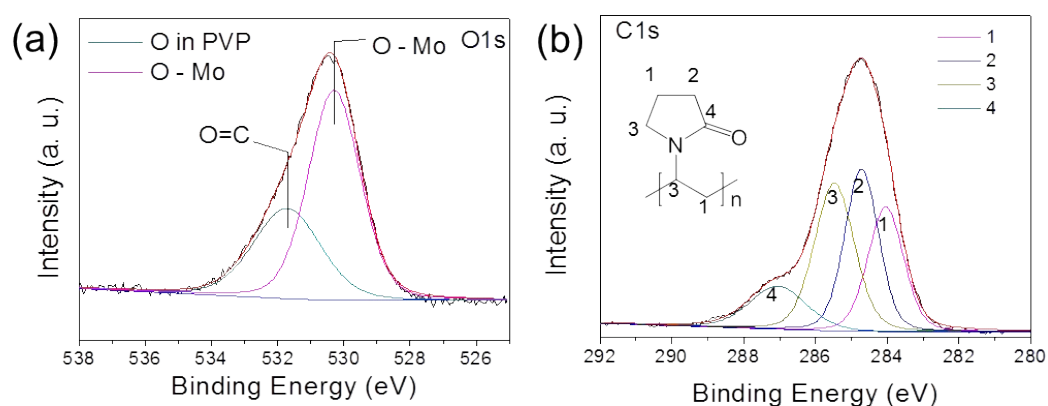

Figure S1. High-resolution XPS spectra of (a) O1s and (b) C1s of the PVP-MoS<sub>2</sub> NPs<sup>1</sup>.

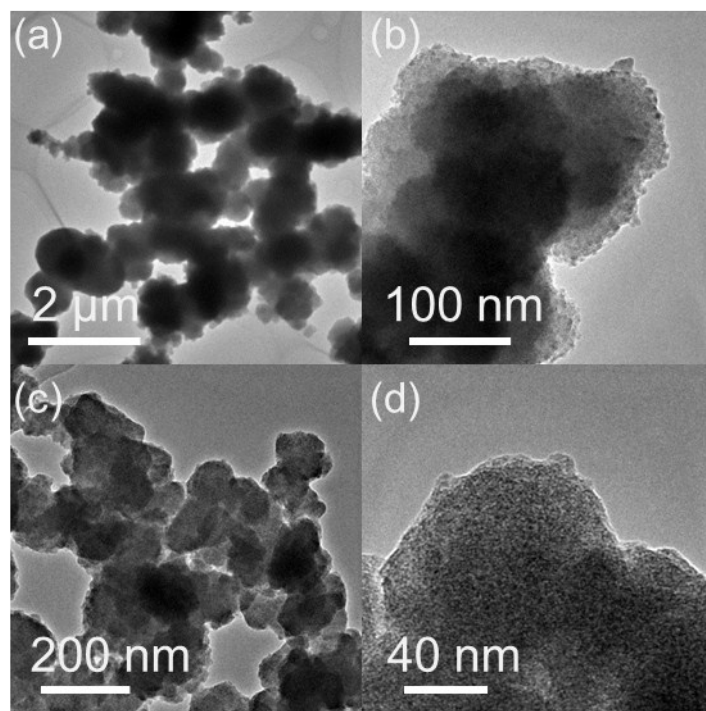

Figure S2. (a-b) TEM images of MoS<sub>2</sub> product synthesized without adding PVP; (c-d) TEM images of MoS<sub>2</sub> product synthesized after adding 0.1g PVP.

Table S1. Comparison of various methods for glucose detection.

| Nanomaterial                                   | Detection Method | Linear Range (mmol L <sup>-1</sup> ) | Ref.      |
|------------------------------------------------|------------------|--------------------------------------|-----------|
| hollow Pt/MWCNTs                               | electrochemistry | 0.0012–8.4                           | 2         |
| PVP-Ag nanowires                               | electrochemistry | 2–20                                 | 3         |
| Cu <sub>2</sub> O nanocubes/graphene           | electrochemistry | 0.3–3.3                              | 4         |
| Au nanoclusters                                | fluorimetry      | 0.01 - 0.5                           | 5         |
| B-doped carbon quantum dot                     | fluorimetry      | 0.008-0.08                           | 6         |
| QDs-ConA-β-CDs-AuNP                            | fluorimetry      | 0.0001-0.05                          | 7         |
| Graphene oxide                                 | colorimetry      | 0.001-0.02                           | 8         |
| carbon nanodots                                | colorimetry      | 0.0010-0.50                          | 9         |
| ZnFe <sub>2</sub> O <sub>4</sub> nanoparticles | colorimetry      | 0.00125-0.01875                      | 10        |
| PVP-MoS <sub>2</sub> nanoparticles             | colorimetry      | 1-10                                 | This work |

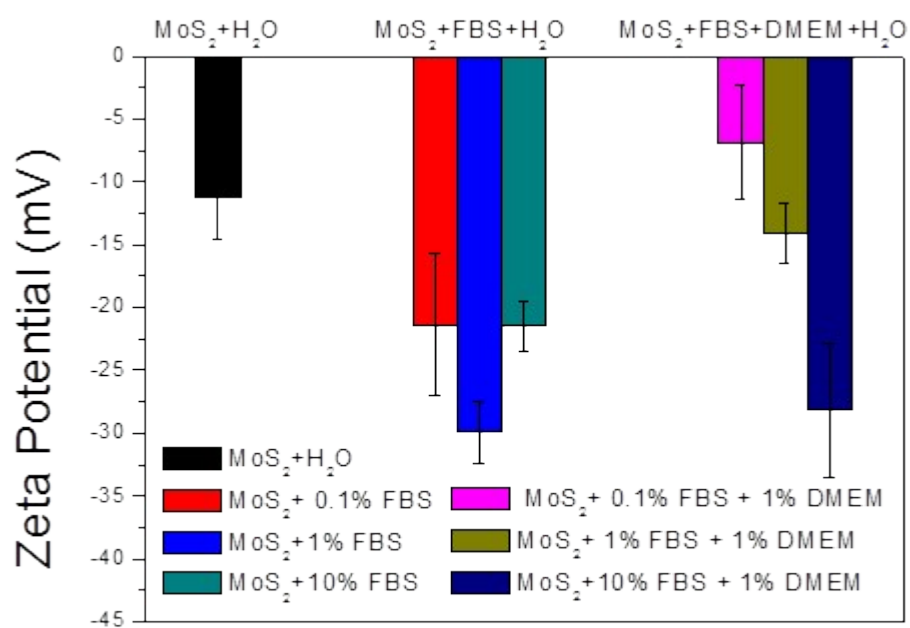

Figure S3. Zeta potential of PVP-MoS<sub>2</sub> NPs dispersed in distilled water, FBS+H<sub>2</sub>O, and FBS+DMEM+H<sub>2</sub>O solutions, respectively.

## Reference

- 1 H. T. Oyama, J. P. Wightman, *Surf. Interface Anal.* 1998, 26, 39-55.
- 2 Y. Wang, R. Yuan, Y. Chaia, W. Li, Y. Zhuo, Y. Yuan, J. Li, *J. Mol. Catal. B: Enzym.* 2011, 71, 146-151.
- 3 X. Yang, J. Bai, Y. Wang, X. Jiang, X. He, *Analyst* 2012, 137, 4362-4367.
- 4 M. Liu, R. Liu, W. Chen, *Biosens. Bioelectron.* 2013, 45, 206-212.
- 5 L. Jin, L. Shang, S. Guo, Y. Fang, D. Wen, L. Wang, J. Yin, S. Dong, *Biosens. Bioelectron.* 2011, 26, 1965-1969.
- 6 X. Shan, L. Chai, J. Ma, Z. Qian, J. Chen, H. Feng, *Analyst* 2014, 139, 2322-2325.
- 7 B. Tang, L. Cao, K. Xu, L. Zhuo, J. Ge, Q. Li, L. Yu, *Chem. - Eur. J.* 2008, 14, 3637-3644.
- 8 Y. Song, K. Qu, C. Zhao, J. Ren, X. Qu, *Adv. Mater.* 2010, 22, 2206-2210.
- 9 W. Shi, Q. Wang, Y. Long, Z. Cheng, S. Chen, H. Zheng, Y. Huang, *Chem. Commun.* 2011, 47, 6695-6697.
- 10 L. Su, J. Feng, X. Zhou, C. Ren, H. Li, X. Chen, *Anal. Chem.* 2012, 84, 5753-5758.
